# Supplementary material for: Unique Features of River Lamprey (Lampetra fluviatilis) Myogenesis
Source: MDPI journal article supplement (doi:10.3390/ijms23158595), 2022-08-02
Supplement: s1 [file s1]

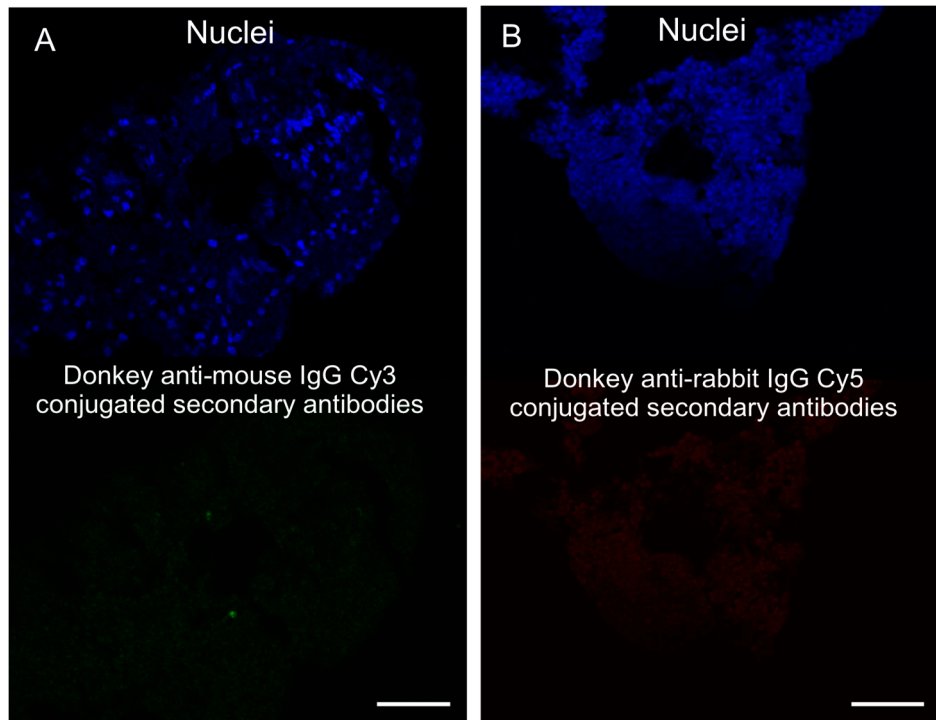

**Figure S1. The control of primary antibody specificity**

The DNA was stained with 4,6-diamidino-2-phenylindole (DAPI; 0.2  $\mu\text{g/ml}$  in PBS). No primary antibodies were used. Instead, tissues were stained using donkey anti-mouse IgG Cy3 conjugated (A), and donkey anti-rabbit IgG Cy5 conjugated (B) (Jackson ImmunoResearch, West Grove, PA, US) secondary antibodies at a dilution of 1:100 in PBST. Scale 25  $\mu\text{m}$ .
